# Supplementary material
Source: publisher site journal article supplement (https://www.spandidos-publications.com/2587/downloadSupplementary)

Figure S1. Detection of LMTK2 mRNA through reverse transcription quantitative PCR in BV2 cells following transfection with LMTK2 overexpressing plasmids or empty plasmids. Data were shown as mean  $\pm$  SD. \*\*\* $P < 0.001$ . LMTK2, Lemurs tyrosine kinase 2; NC, negative control.

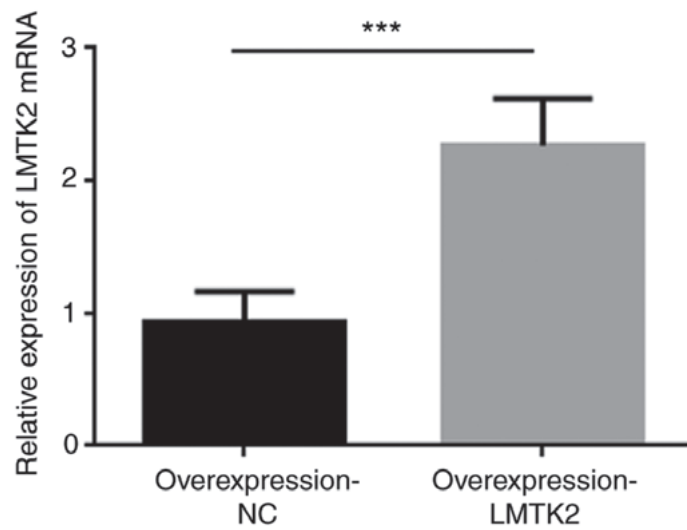

Supplement: Supplementary file 1 [file downloadSupplementary]
